# Supplementary material for: Design of spontaneously blinking fluorophores for live-cell super-resolution imaging based on quantum-chemical calculations
Source: Royal Society of Chemistry journal article supplement (doi:10.1039/d0cc05126h), 2020-01-01
Supplement: d0cc05126h1.xlsx [file d0cc05126h1.xlsx]

## Sheet: HMSiR
HMSiR
open form A
C	-4.22587	-0.664282	-0.11033
C	-3.15023	-1.55605	0.195129
C	-1.83286	-1.2611	-0.095193
C	-1.49246	-0.016682	-0.735276
C	-2.58049	0.854688	-1.05683
C	-3.88727	0.555882	-0.765535
H	-3.38331	-2.4977	0.679101
H	-2.37842	1.79306	-1.55761
H	-4.65973	1.26276	-1.03833
C	1.03604	-0.392209	-0.886209
C	1.06171	-1.71563	-0.318331
C	2.29543	0.152689	-1.29275
C	2.25167	-2.40858	-0.222841
C	3.47528	-0.538857	-1.19027
H	2.33265	1.15305	-1.70407
C	3.50006	-1.86067	-0.655586
H	2.24717	-3.40237	0.209819
H	4.39053	-0.065847	-1.52106
N	4.65248	-2.55979	-0.547898
N	-5.50512	-0.96391	0.209534
C	-0.154419	0.382573	-1.0534
C	0.036798	2.81111	0.683134
H	-0.081276	3.81452	1.10532
C	0.102006	2.90505	-0.826999
C	0.013003	1.7575	-1.64592
C	0.25672	4.1553	-1.43756
H	0.326694	5.03888	-0.808728
C	0.075956	1.89373	-3.03896
H	0.004443	1.00792	-3.66292
C	0.315612	4.28626	-2.82579
H	0.432529	5.26803	-3.27447
C	0.222767	3.15024	-3.62889
H	0.264264	3.23614	-4.71041
O	1.68679	3.08294	4.87638
H	2.26538	3.81103	3.39719
H	2.50953	2.71593	5.23157
H	0.737705	1.35359	2.68335
H	1.23453	2.29968	4.47722
H	-0.458862	1.18148	3.64157
O	0.482615	0.968946	3.56137
O	2.57777	4.11213	2.5049
H	2.04621	4.90065	2.32289
O	1.20432	2.18142	1.24148
H	1.78373	2.90085	1.60871
H	-0.831421	2.21938	0.990546
Si	-0.496266	-2.4892	0.395931
C	-0.350918	-2.58346	2.27234
H	-1.28459	-2.94368	2.71883
H	0.44787	-3.27608	2.56094
H	-0.122363	-1.60462	2.70646
C	-0.823242	-4.18751	-0.347082
H	-1.75285	-4.61468	0.045132
H	-0.906381	-4.13935	-1.43759
H	-0.009966	-4.8792	-0.100101
C	-6.58711	-0.027204	-0.102599
H	-7.53326	-0.46583	0.207384
H	-6.45389	0.92301	0.425591
H	-6.63721	0.173364	-1.17726
C	-5.83118	-2.20209	0.922545
H	-5.57683	-3.08469	0.326671
H	-5.30047	-2.26127	1.87804
H	-6.90073	-2.22118	1.12269
C	5.92207	-1.96898	-0.976452
H	6.13745	-1.05096	-0.420442
H	6.72437	-2.67939	-0.787881
H	5.91092	-1.73563	-2.04626
C	4.65433	-3.92586	-0.017426
H	4.30179	-3.95125	1.01865
H	4.02037	-4.58338	-0.620793
H	5.67165	-4.31098	-0.043846
TS A
C	-4.3834	-0.965555	-0.143754
C	-3.19322	-1.71073	0.060227
C	-1.93117	-1.11814	0.098485
C	-1.79807	0.282498	-0.092909
C	-2.98052	1.0218	-0.298772
C	-4.23136	0.428299	-0.339135
H	-3.26374	-2.78416	0.191738
H	-2.93169	2.09364	-0.447139
H	-5.09418	1.05636	-0.519904
C	0.782564	0.283157	-0.425329
C	0.971433	-1.10857	-0.231528
C	1.86024	1.02165	-0.949176
C	2.201	-1.69215	-0.548404
C	3.07249	0.431327	-1.27669
H	1.75866	2.08573	-1.12248
C	3.29133	-0.94526	-1.05082
H	2.31756	-2.75935	-0.401237
H	3.84933	1.05398	-1.70125
N	4.53935	-1.52815	-1.27384
N	-5.62571	-1.562	-0.131806
C	-0.481147	0.993394	-0.032444
C	-0.421826	2.68823	1.98475
H	-1.33199	2.82119	2.57737
H	0.43691	3.02013	2.57524
C	-0.510242	3.35745	0.644853
C	-0.542869	2.45387	-0.416093
C	-0.583621	4.73188	0.4138
H	-0.557001	5.42792	1.24697
C	-0.656837	2.91944	-1.73033
H	-0.688483	2.21716	-2.55736
C	-0.689625	5.19665	-0.897111
H	-0.742974	6.26391	-1.08848
C	-0.727003	4.29259	-1.96518
H	-0.811452	4.65926	-2.98336
Si	-0.421249	-2.18246	0.440986
O	-0.270513	1.27417	1.69601
C	-0.220333	-2.47929	2.29547
H	0.725425	-2.98909	2.51184
H	-0.239098	-1.53992	2.85719
H	-1.03254	-3.11098	2.67318
C	-0.501165	-3.82489	-0.475891
H	0.386877	-4.43235	-0.268468
H	-1.37416	-4.40787	-0.161927
H	-0.565068	-3.67976	-1.55913
O	1.83712	0.496409	2.75365
H	1.88738	-0.461418	2.61545
H	0.672922	0.932327	2.0617
O	4.12412	1.43601	1.78855
H	2.69134	0.860752	2.37105
H	3.87772	1.67274	0.881584
H	5.09868	-1.49485	2.02002
H	5.25497	-1.1486	0.534214
H	4.66948	0.616883	1.67269
O	5.5584	-0.881205	1.42829
C	-6.77511	-0.820348	-0.647416
H	-7.66946	-1.43206	-0.529537
H	-6.93093	0.103177	-0.083762
H	-6.6674	-0.564047	-1.71053
C	-5.72112	-3.01971	-0.157004
H	-5.31106	-3.45621	-1.07864
H	-5.19848	-3.46121	0.695604
H	-6.77072	-3.30387	-0.081691
C	4.62787	-2.99102	-1.34099
H	4.27979	-3.44449	-0.410622
H	4.04651	-3.40781	-2.17473
H	5.67395	-3.26907	-1.47213
C	5.50215	-0.806741	-2.11534
H	5.72782	0.173983	-1.69161
H	6.43187	-1.37557	-2.14408
H	5.13946	-0.673031	-3.14357
open form B
C	4.02988	-1.1873	-0.027589
C	2.91403	-2.04937	0.193325
C	1.62092	-1.66667	-0.074102
C	1.34481	-0.357182	-0.589926
C	2.46997	0.485778	-0.828138
C	3.75612	0.101155	-0.566585
H	3.09884	-3.04131	0.58753
H	2.31456	1.47933	-1.22894
H	4.56304	0.792176	-0.769641
C	-1.20018	-0.540989	-0.621392
C	-1.29947	-1.88019	-0.11854
C	-2.42749	0.135336	-0.883622
C	-2.53141	-2.44994	0.103119
C	-3.65155	-0.429248	-0.653317
H	-2.4058	1.14488	-1.27406
C	-3.75269	-1.7509	-0.13522
H	-2.58301	-3.46401	0.481978
H	-4.5427	0.145467	-0.866808
N	-4.94562	-2.31416	0.124498
C	0.033096	0.13862	-0.844392
C	-0.060298	1.52493	-1.41616
C	-0.163918	2.65672	-0.590132
C	-0.044048	1.66636	-2.80392
C	-0.249928	3.91059	-1.19509
C	-0.130973	2.92524	-3.39108
H	0.036061	0.780961	-3.42775
C	-0.234556	4.05077	-2.58091
H	-0.330336	4.7878	-0.563296
H	-0.118208	3.02115	-4.47203
H	-0.30421	5.03939	-3.02425
C	-0.17982	2.51452	0.924305
H	-0.988762	1.81375	1.18799
H	0.75671	2.01518	1.22422
O	-0.336161	3.72185	1.61432
H	-1.78172	4.28524	1.37977
N	5.28371	-1.57663	0.263398
O	-2.73312	4.62798	1.27919
H	-2.8181	4.88251	0.351427
O	-0.694847	3.19484	4.12186
H	-0.564549	3.40009	3.13588
H	-1.64903	3.21423	4.26919
O	1.86402	5.06332	1.58909
H	0.991349	4.54011	1.57375
H	2.02649	5.32188	0.672903
C	0.258854	-3.50654	1.99661
H	1.18046	-4.06144	2.20161
H	0.196176	-2.67705	2.70727
H	-0.584724	-4.17971	2.18194
C	0.351782	-4.32604	-0.977336
H	-0.481253	-5.02033	-0.824804
H	0.319685	-3.97769	-2.01414
H	1.28529	-4.88002	-0.83266
Si	0.238316	-2.89643	0.227961
C	-6.17896	-1.56208	-0.084653
H	-6.30029	-1.28357	-1.1357
H	-7.02369	-2.18389	0.203279
H	-6.19579	-0.652689	0.523615
C	-5.03008	-3.66737	0.665207
H	-4.59996	-4.39748	-0.026833
H	-4.51119	-3.74416	1.62529
H	-6.07681	-3.91843	0.819555
C	6.41004	-0.68251	0.014645
H	7.32489	-1.16436	0.351628
H	6.51013	-0.457923	-1.05184
H	6.29484	0.256831	0.562782
C	5.54441	-2.909	0.801699
H	5.03893	-3.05388	1.76095
H	5.21459	-3.68767	0.107491
H	6.6146	-3.02186	0.959369
TS B
C	3.62496	-1.29611	-0.729862
C	2.42324	-1.98977	-0.429489
C	1.19844	-1.35179	-0.336443
C	1.10524	0.053491	-0.536521
C	2.30946	0.739751	-0.823539
C	3.52416	0.104219	-0.921262
H	2.46791	-3.06041	-0.26896
H	2.29433	1.8119	-0.973918
H	4.40407	0.69327	-1.14279
C	-1.45515	0.234766	-0.357921
C	-1.71639	-1.15252	-0.180127
C	-2.57975	1.09016	-0.450393
C	-3.01845	-1.61862	-0.149599
C	-3.87231	0.626603	-0.417272
H	-2.4334	2.15868	-0.547051
C	-4.1406	-0.759461	-0.287623
H	-3.18957	-2.67943	-0.010812
H	-4.6833	1.3387	-0.490406
N	-5.41071	-1.23959	-0.296857
C	-0.127388	0.80812	-0.41808
C	-0.044798	2.25565	-0.806367
C	0.233791	3.24357	0.135592
C	-0.223049	2.60622	-2.14905
C	0.324742	4.57572	-0.27163
C	-0.127277	3.93312	-2.54883
H	-0.437248	1.83298	-2.88077
C	0.147738	4.9234	-1.60518
H	0.53425	5.34369	0.468356
H	-0.270286	4.19392	-3.59253
H	0.218178	5.96275	-1.91035
C	0.443609	2.81512	1.56942
H	1.50467	2.97228	1.83185
H	-0.137588	3.48164	2.22751
O	0.071834	1.47967	1.73403
H	1.20097	0.659226	2.3408
N	4.81436	-1.94367	-0.836557
O	1.96894	0.145157	2.78909
H	2.17588	-0.588716	2.19417
O	-2.15292	1.2899	3.04643
H	-1.28068	1.36225	2.53645
H	-1.91359	1.30959	3.98168
C	-0.265338	-2.92343	1.87262
H	-0.195157	-2.06943	2.55304
H	-1.17021	-3.48586	2.12696
H	0.597682	-3.57401	2.04988
C	-0.467518	-3.84452	-1.06278
H	-0.472893	-3.53651	-2.11275
H	0.370762	-4.53342	-0.914609
H	-1.39123	-4.39874	-0.865707
Si	-0.317465	-2.37017	0.082001
O	4.05631	1.88313	2.89493
H	3.3008	1.2471	2.83712
H	3.79734	2.63291	2.34315
C	-6.53678	-0.315113	-0.254808
H	-6.52645	0.360931	-1.11358
H	-7.46196	-0.887069	-0.290304
H	-6.53619	0.285279	0.662822
C	-5.66704	-2.64732	-0.018525
H	-5.11823	-3.29044	-0.710569
H	-5.39009	-2.92077	1.00685
H	-6.72918	-2.84395	-0.152894
C	6.04641	-1.17946	-0.989494
H	6.88013	-1.87234	-1.08666
H	6.01769	-0.562481	-1.89129
H	6.23409	-0.527943	-0.127748
C	4.92075	-3.34584	-0.452616
H	4.69929	-3.49665	0.610919
H	4.2434	-3.97023	-1.04047
H	5.93628	-3.68655	-0.645131

## Sheet: HMTMCR
HMTMCR
open form A
C	4.31855	-0.706284	0.301373
C	3.61713	0.523907	0.461387
C	2.29069	0.675091	0.107046
C	1.5838	-0.437809	-0.453831
C	2.29051	-1.66708	-0.613542
C	3.602	-1.81248	-0.249906
H	4.14683	1.36705	0.881755
H	1.77083	-2.51713	-1.03915
H	4.09081	-2.76683	-0.393742
C	-0.486071	0.89057	-0.675853
C	0.146431	2.05008	-0.121084
C	-1.85902	0.993265	-1.05183
C	-0.58112	3.21575	0.018302
C	-2.57549	2.14975	-0.904694
H	-2.35302	0.123603	-1.46755
C	-1.95138	3.31411	-0.360288
H	-0.09686	4.08881	0.43269
H	-3.61405	2.17317	-1.20657
N	-2.63946	4.47124	-0.209536
N	5.62073	-0.821725	0.656754
C	0.226681	-0.320164	-0.840805
C	-1.19612	-2.44093	0.766436
H	-1.42455	-3.44201	1.15161
C	-1.09527	-2.49975	-0.743036
C	-0.451815	-1.49044	-1.48986
C	-1.68868	-3.56781	-1.42914
H	-2.18059	-4.34856	-0.854485
C	-0.422712	-1.57422	-2.88922
H	0.076817	-0.795215	-3.45717
C	-1.65553	-3.64797	-2.82162
H	-2.12135	-4.48707	-3.32915
C	-1.02072	-2.64528	-3.55411
H	-0.985639	-2.69362	-4.63814
O	-4.94083	-3.6223	2.8509
H	-4.75992	-2.95258	1.25084
H	-5.72082	-3.13961	3.16089
H	-2.5282	-1.87078	2.90946
H	-4.18173	-3.13669	3.26321
H	-3.22161	-1.44183	4.21694
O	-2.7956	-2.20506	3.80026
O	-4.58405	-2.47779	0.39773
H	-4.30564	-3.17647	-0.212407
O	-2.18606	-1.49623	1.21098
H	-3.06312	-1.80434	0.858861
H	-0.249393	-2.12158	1.20944
C	1.68226	2.39193	1.82845
H	2.71958	2.42403	2.17035
H	1.23795	3.37318	2.01164
H	1.14508	1.65282	2.43005
C	2.38716	3.10231	-0.503856
H	3.43336	3.14524	-0.191878
H	2.35624	2.87147	-1.57281
H	1.95043	4.09271	-0.35436
C	1.61368	2.03261	0.317217
C	6.31715	-2.10325	0.521924
H	6.38787	-2.41194	-0.526601
H	7.32564	-2.00012	0.917759
H	5.80814	-2.89207	1.08431
C	6.35933	0.32984	1.17896
H	6.34209	1.16505	0.471658
H	5.9437	0.67088	2.13346
H	7.39603	0.040704	1.34027
C	-1.9811	5.67302	0.306013
H	-1.59884	5.51558	1.31983
H	-1.14836	5.97724	-0.337116
H	-2.70536	6.48471	0.336633
C	-4.04536	4.55872	-0.611813
H	-4.16737	4.37945	-1.6854
H	-4.65834	3.83498	-0.065506
H	-4.41313	5.55739	-0.384937
TS A
C	-3.93133	-2.19637	0.48888
C	-2.62936	-2.62359	0.145391
C	-1.56113	-1.73845	-0.030749
C	-1.78104	-0.359305	0.153044
C	-3.06933	0.069919	0.530879
C	-4.12115	-0.806732	0.702086
H	-2.44776	-3.68072	0.011465
H	-3.24458	1.1269	0.701786
H	-5.08652	-0.415113	0.994672
C	0.571527	0.143455	-0.590499
C	0.851724	-1.23154	-0.697434
C	1.55902	1.06402	-0.9904
C	2.12619	-1.62966	-1.12127
C	2.80741	0.66341	-1.42948
H	1.34391	2.1262	-0.954023
C	3.13928	-0.71111	-1.45532
H	2.3339	-2.68773	-1.19268
H	3.52107	1.41775	-1.73353
N	4.43882	-1.134	-1.76304
N	-4.9851	-3.08819	0.580824
C	-0.692006	0.636846	0.022109
O	-0.299059	1.03153	1.63085
C	-0.197334	2.4716	1.7949
H	0.857181	2.75479	1.88362
C	-0.842379	3.02328	0.558732
C	-1.10768	2.03169	-0.383653
C	-1.15866	4.35684	0.299236
C	-1.69385	2.35875	-1.60837
H	-1.90093	1.58488	-2.34092
C	-1.74414	4.6863	-0.924185
H	-1.99743	5.71986	-1.13891
C	-2.01111	3.69174	-1.8728
H	-2.47023	3.95683	-2.82007
O	3.8653	1.25252	1.74339
H	2.53552	0.444536	2.2509
H	3.54732	1.61073	0.900445
H	5.14841	-1.5366	1.42902
H	4.48565	0.528686	1.46741
H	5.19133	-0.936562	0.017338
O	5.50993	-0.785466	0.935785
O	1.71342	-0.0643	2.53534
H	1.79715	-0.927595	2.10102
H	0.599374	0.530338	1.98964
C	-0.190062	-2.31763	-0.401809
C	0.306725	-3.19679	0.778498
H	-0.386847	-4.02205	0.961781
H	1.28899	-3.62469	0.560567
H	0.381572	-2.61069	1.69995
C	-0.340195	-3.2005	-1.67151
H	-0.691188	-2.60508	-2.51986
H	0.613067	-3.65776	-1.94652
H	-1.05372	-4.0104	-1.50482
H	-0.720094	2.74736	2.7151
H	-0.952902	5.12416	1.03951
C	-6.21167	-2.66151	1.25262
H	-6.65132	-1.79458	0.753361
H	-6.9399	-3.47109	1.20148
H	-6.04955	-2.40937	2.31015
C	-4.69972	-4.52109	0.617725
H	-4.16422	-4.83657	-0.281489
H	-4.10588	-4.81536	1.49508
H	-5.64345	-5.06629	0.644866
C	5.29612	-0.221969	-2.53118
H	5.44187	0.719562	-1.99834
H	6.27601	-0.685717	-2.64956
H	4.88722	-0.004481	-3.52737
C	4.65306	-2.55536	-2.05551
H	4.35956	-3.17427	-1.20474
H	4.10027	-2.88987	-2.94443
H	5.71767	-2.71613	-2.22875
open form B
C	3.75544	-1.67333	-0.012503
C	2.53657	-2.3809	0.17163
C	1.30916	-1.81883	-0.099874
C	1.24754	-0.487674	-0.608441
C	2.47115	0.205873	-0.822003
C	3.68424	-0.349121	-0.537746
H	2.57987	-3.39258	0.547673
H	2.43863	1.21481	-1.21601
H	4.58504	0.223781	-0.709971
C	-1.21182	-0.523963	-0.614316
C	-1.23706	-1.85973	-0.115443
C	-2.45393	0.13514	-0.828764
C	-2.44936	-2.46376	0.134096
C	-3.65206	-0.459439	-0.56111
H	-2.4489	1.14953	-1.20977
C	-3.68786	-1.79407	-0.059192
H	-2.46498	-3.47994	0.500024
H	-4.568	0.090116	-0.729883
N	-4.85838	-2.3961	0.230647
C	0.009299	0.133311	-0.867352
C	-0.009825	1.51509	-1.44001
C	-0.020814	2.65244	-0.615084
C	-0.017105	1.65123	-2.82868
C	-0.038771	3.9078	-1.22223
C	-0.034943	2.91226	-3.41755
H	-0.008752	0.761227	-3.45099
C	-0.045758	4.0432	-2.60868
H	-0.047228	4.7902	-0.592651
H	-0.040276	3.00542	-4.49876
H	-0.059914	5.03336	-3.0538
C	-0.013854	2.51152	0.899116
H	-0.885363	1.89843	1.18287
H	0.871824	1.91688	1.17735
O	-0.02425	3.72752	1.59141
H	-1.41793	4.42369	1.45748
N	4.93985	-2.23052	0.308471
O	-2.33485	4.86253	1.42645
H	-2.46265	5.12894	0.506994
O	-0.261757	3.25359	4.12436
H	-0.180459	3.43524	3.12872
H	-1.20742	3.27977	4.31853
O	2.26241	4.9039	1.42783
H	1.35479	4.44522	1.46566
H	2.37947	5.16873	0.506504
C	0.047517	-2.64495	0.126825
C	0.046347	-3.18057	1.57686
H	0.932577	-3.78882	1.76418
H	0.03321	-2.35762	2.29659
H	-0.826928	-3.8098	1.7554
C	0.074217	-3.83837	-0.860638
H	-0.800978	-4.47409	-0.709492
H	0.073629	-3.48903	-1.89687
H	0.970238	-4.44203	-0.699742
C	-4.88446	-3.75218	0.767522
H	-4.43707	-4.46448	0.06778
H	-4.34852	-3.81406	1.71993
H	-5.91844	-4.04458	0.935517
C	-6.11916	-1.67661	0.077735
H	-6.15095	-0.789123	0.717594
H	-6.27753	-1.36665	-0.959298
H	-6.93614	-2.33504	0.364027
C	6.18138	-1.48215	0.138172
H	7.0105	-2.09335	0.487625
H	6.3568	-1.2334	-0.912982
H	6.16897	-0.556208	0.72066
C	5.00354	-3.58452	0.84732
H	4.44121	-3.66582	1.78253
H	4.60758	-4.31486	0.13495
H	6.04268	-3.83375	1.04952
TS B
C	-1.14404	3.86181	-0.737178
C	0.17572	3.46258	-0.434872
C	0.558268	2.13018	-0.369043
C	-0.406207	1.12372	-0.595544
C	-1.7278	1.5215	-0.894422
C	-2.10014	2.8397	-0.967305
H	0.917539	4.22367	-0.243322
H	-2.48377	0.76262	-1.05835
H	-3.12906	3.08378	-1.19319
C	1.29925	-0.653919	-0.324224
C	2.31057	0.307396	-0.090231
C	1.66941	-2.0182	-0.358278
C	3.61445	-0.116593	0.108215
C	2.96023	-2.43539	-0.165378
H	0.906579	-2.76687	-0.53851
C	3.98408	-1.48143	0.078531
H	4.38007	0.621856	0.296512
H	3.18655	-3.49261	-0.199997
N	5.27386	-1.86813	0.264773
C	-0.072491	-0.269412	-0.480817
C	-1.03994	-1.28477	-1.00437
C	-1.76458	-2.09541	-0.133746
C	-1.19543	-1.4327	-2.3857
C	-2.65328	-3.04015	-0.647156
C	-2.07695	-2.38037	-2.89328
H	-0.626374	-0.801926	-3.06214
C	-2.81067	-3.18472	-2.02119
H	-3.22565	-3.66111	0.036807
H	-2.19613	-2.48609	-3.96676
H	-3.50725	-3.91893	-2.41375
C	-1.51862	-1.89399	1.34144
H	-2.48145	-1.90892	1.87622
O	-0.8378	-0.687526	1.53474
N	-1.48938	5.18416	-0.818695
O	1.07755	-1.00924	3.26553
H	0.331398	-0.877815	2.59715
H	0.645643	-1.08595	4.12572
O	-2.64017	0.995184	2.24865
H	-1.89044	0.36886	1.94844
H	-2.50194	1.81641	1.75664
C	2.30793	2.30619	1.39803
H	1.67677	1.7959	2.1306
H	3.35295	2.12105	1.65675
H	2.12442	3.38047	1.47153
C	2.93238	2.53697	-1.03523
H	2.74081	2.20318	-2.05902
H	2.77432	3.61594	-0.991593
H	3.98252	2.34965	-0.804561
C	2.01045	1.80266	-0.034746
O	-4.76603	-0.179896	0.961143
H	-4.36866	-0.828584	0.364012
H	-4.00229	0.243165	1.42217
H	-0.935936	-2.74785	1.72655
C	5.60189	-3.28316	0.375707
H	5.35755	-3.8237	-0.543527
H	6.67148	-3.38447	0.549341
H	5.07239	-3.75932	1.20899
C	6.29445	-0.884642	0.598943
H	6.37198	-0.116671	-0.175886
H	6.08991	-0.392404	1.55731
H	7.25751	-1.38658	0.669872
C	-2.9025	5.54754	-0.804674
H	-2.98551	6.62998	-0.887125
H	-3.43205	5.11062	-1.65347
H	-3.40003	5.22846	0.120205
C	-0.560048	6.19459	-0.330197
H	-0.366996	6.09362	0.746007
H	0.39249	6.14237	-0.861201
H	-0.985439	7.17993	-0.514431

## Sheet: HMSiR660
HMSiR600
open form A
C	4.34096	-0.787921	0.433941
C	3.66911	0.466564	0.381611
C	2.35104	0.57761	-0.010823
C	1.60897	-0.599835	-0.384496
C	2.3034	-1.85024	-0.323145
C	3.61564	-1.95015	0.065199
H	4.23632	1.3499	0.66668
H	1.78889	-2.75795	-0.612387
H	4.11252	-2.91512	0.088087
C	-0.534043	0.581483	-1.14525
C	-0.071784	1.93204	-0.945755
C	-1.84744	0.422535	-1.69176
C	-0.850966	2.99573	-1.35206
C	-2.61759	1.48706	-2.08834
H	-2.2584	-0.570975	-1.81191
C	-2.1295	2.81184	-1.95163
H	-0.507337	4.01826	-1.21132
H	-3.60521	1.32628	-2.50947
N	-2.85686	3.86679	-2.35538
N	5.62666	-0.86406	0.816073
C	0.246299	-0.578103	-0.828092
C	-0.7619	-2.23351	1.49165
H	-1.38103	-2.88378	2.1223
C	-0.901311	-2.67668	0.046208
C	-0.406855	-1.91698	-1.03726
C	-1.50158	-3.91322	-0.22142
H	-1.89726	-4.49276	0.60838
C	-0.513637	-2.42202	-2.34132
H	-0.129372	-1.8331	-3.16863
C	-1.59844	-4.41281	-1.52043
H	-2.06629	-5.37646	-1.69746
C	-1.0982	-3.66489	-2.58551
H	-1.16687	-4.03846	-3.60252
O	-3.81209	0.782572	3.78888
H	-3.85546	-0.082656	2.28015
H	-3.81325	1.69616	3.468
H	-1.04264	-0.224357	3.35708
H	-2.86145	0.612636	4.01105
H	-0.725166	1.07736	4.11583
O	-1.1638	0.22155	4.23011
O	-3.74412	-0.542922	1.40733
H	-4.03953	-1.44919	1.57838
H	6.10214	-1.75451	0.855408
H	-2.4998	4.80697	-2.26109
H	-3.76126	3.73836	-2.78653
O	-1.08696	-0.861142	1.71438
H	-2.05573	-0.737643	1.52146
H	6.14015	-0.034019	1.076
H	0.276186	-2.35899	1.8191
Si	1.51048	2.25853	0.015076
C	1.06703	2.71597	1.79076
H	1.97132	2.83512	2.39786
H	0.512156	3.66027	1.82194
H	0.445546	1.94296	2.2563
C	2.56931	3.58412	-0.79384
H	3.50794	3.72062	-0.245623
H	2.81543	3.3275	-1.82911
H	2.04686	4.54708	-0.799014
TS A
C	-4.36844	-1.55299	0.155623
C	-3.13735	-2.22954	0.035068
C	-1.91858	-1.55367	-0.035688
C	-1.8995	-0.134091	-0.004356
C	-3.13508	0.534075	0.148777
C	-4.33803	-0.146004	0.226179
H	-3.15814	-3.317	0.000127
H	-3.16078	1.61541	0.210207
H	-5.26813	0.404457	0.336957
C	0.630669	0.119237	-0.632195
C	0.937006	-1.26574	-0.630656
C	1.61639	1.0162	-1.09373
C	2.20292	-1.68769	-1.04978
C	2.86548	0.583255	-1.5134
H	1.41152	2.07908	-1.12634
C	3.19	-0.781965	-1.47025
H	2.44934	-2.74748	-1.05131
H	3.60019	1.30152	-1.8662
N	4.48399	-1.2159	-1.76568
N	-5.559	-2.23946	0.154755
C	-0.646259	0.682024	-0.068366
O	-0.261872	0.947702	1.62996
C	-0.143405	2.36941	1.89936
H	0.900565	2.60498	2.13115
C	-0.616035	3.0391	0.643657
C	-0.872554	2.14136	-0.390629
C	-0.793645	4.41078	0.45666
C	-1.30496	2.60698	-1.63622
H	-1.505	1.90714	-2.44144
C	-1.22455	4.87641	-0.785563
H	-1.3667	5.94113	-0.942668
C	-1.47824	3.97752	-1.82849
H	-1.81505	4.34647	-2.79217
O	3.95634	1.2313	1.67394
H	2.62515	0.394809	2.18921
H	3.63414	1.60354	0.839385
H	5.35482	-1.51215	1.37206
H	4.58705	0.521618	1.38371
H	5.33347	-0.954	-0.05939
O	5.65378	-0.752437	0.851004
O	1.82034	-0.128074	2.48624
H	1.92705	-0.995215	2.06706
H	0.63233	0.454838	1.93285
H	-6.36196	-1.7555	0.534714
H	-5.51714	-3.22133	0.394712
H	4.54551	-2.19123	-2.03912
H	4.9879	-0.61581	-2.41103
C	0.073807	-3.25425	1.60141
H	-0.691398	-3.97733	1.90625
H	1.03798	-3.77492	1.59413
H	0.11447	-2.4706	2.36504
C	-0.433713	-3.93905	-1.37205
H	-0.628358	-3.55125	-2.37723
H	0.500558	-4.51055	-1.40548
H	-1.23728	-4.63959	-1.11891
H	-0.763715	2.60659	2.76867
H	-0.597033	5.10341	1.26957
Si	-0.330755	-2.5514	-0.103523
open form B
C	-2.0101	-3.83791	0.022064
C	-2.71651	-2.64244	0.31355
C	-2.17496	-1.40067	0.078474
C	-0.859983	-1.28614	-0.485508
C	-0.165744	-2.50145	-0.764772
C	-0.709147	-3.73276	-0.523016
H	-3.71335	-2.74241	0.737649
H	0.832026	-2.46124	-1.18222
H	-0.15178	-4.63677	-0.74648
C	-0.749942	1.26528	-0.556928
C	-2.04214	1.52424	0.011038
C	0.041678	2.39832	-0.911806
C	-2.46832	2.81974	0.186825
C	-0.388695	3.68403	-0.731786
H	1.02375	2.24814	-1.34111
C	-1.66485	3.93151	-0.174465
H	-3.44624	3.02852	0.614725
H	0.240207	4.52282	-1.01236
N	-2.10895	5.18438	0.007485
C	-0.223183	-0.043013	-0.772987
C	1.13963	-0.119925	-1.40077
C	2.3071	-0.14314	-0.61997
C	1.22179	-0.168998	-2.79254
C	3.53696	-0.216703	-1.2737
C	2.45747	-0.242361	-3.42838
H	0.308734	-0.149627	-3.38027
C	3.61852	-0.266269	-2.66331
H	4.44156	-0.235899	-0.676635
H	2.50784	-0.279789	-4.51182
H	4.58939	-0.324655	-3.14568
C	2.22827	-0.101842	0.898083
H	1.6186	0.771694	1.18126
H	1.65427	-0.984614	1.22662
O	3.47182	-0.059181	1.53764
H	4.16462	1.32991	1.30445
N	-2.56474	-5.03588	0.259351
O	4.60217	2.24178	1.20897
H	4.87189	2.30409	0.283709
O	3.09218	0.246883	4.07855
H	3.23599	0.140788	3.07889
H	3.11807	1.19739	4.24729
H	-1.53432	5.9776	-0.240095
H	-3.48866	-5.10595	0.661993
H	-2.05507	-5.88753	0.070705
H	-3.01677	5.35604	0.416048
O	4.60882	-2.36891	1.48208
H	4.1673	-1.45172	1.47768
H	4.85712	-2.54008	0.56463
C	-3.4752	0.170492	2.37723
H	-4.0949	-0.677669	2.68691
H	-2.53505	0.126939	2.93527
H	-3.99775	1.0905	2.65957
C	-4.783	0.176162	-0.423124
H	-5.3449	1.08307	-0.17653
H	-4.60838	0.165983	-1.50318
H	-5.40937	-0.685698	-0.169902
Si	-3.17406	0.121373	0.530567
TS B
C	-2.60337	2.81005	-1.2277
C	-1.26724	3.01929	-0.819141
C	-0.397714	1.97018	-0.590694
C	-0.838219	0.626706	-0.770854
C	-2.18833	0.433672	-1.16049
C	-3.04757	1.48136	-1.38784
H	-0.935864	4.0466	-0.685908
H	-2.57174	-0.570384	-1.28955
H	-4.07332	1.29521	-1.69098
C	1.43958	-0.504215	-0.394262
C	2.19238	0.686965	-0.179141
C	2.15698	-1.72639	-0.438655
C	3.5675	0.622298	-0.060115
C	3.52417	-1.78343	-0.319268
H	1.62251	-2.65777	-0.574992
C	4.26887	-0.601232	-0.134649
H	4.14933	1.52696	0.10177
H	4.04061	-2.73708	-0.366703
N	5.61945	-0.633562	-0.046597
C	0.001693	-0.52925	-0.548746
C	-0.604787	-1.85994	-0.884049
C	-1.18058	-2.67288	0.090205
C	-0.58548	-2.28242	-2.21912
C	-1.73017	-3.90209	-0.282784
C	-1.13509	-3.50468	-2.58154
H	-0.135457	-1.64485	-2.97432
C	-1.71085	-4.32042	-1.60653
H	-2.17641	-4.53395	0.480913
H	-1.11357	-3.82035	-3.6196
H	-2.1417	-5.27833	-1.88078
C	-1.19555	-2.20369	1.52855
H	-2.24464	-2.1713	1.87134
H	-0.697653	-2.96979	2.14691
O	-0.577205	-0.961752	1.66128
N	-3.4268	3.85444	-1.46981
O	1.57103	-1.13401	3.08796
H	0.718338	-1.05833	2.54351
H	1.29923	-1.10757	4.01404
O	-2.25551	0.813953	2.33731
H	-1.56649	0.109233	2.03312
H	-2.44641	1.3498	1.55526
C	1.27303	2.80871	1.83939
H	0.79055	2.02683	2.43377
H	2.28378	2.96213	2.23193
H	0.710392	3.73851	1.97477
C	2.15436	3.67779	-0.989271
H	2.186	3.41658	-2.05127
H	1.61377	4.62463	-0.887086
H	3.18114	3.84478	-0.647344
H	6.12873	0.199973	0.209434
H	6.09838	-1.51914	0.032055
H	-4.39968	3.69812	-1.68963
H	-3.12699	4.79884	-1.27633
O	-4.46303	-0.565669	3.09326
H	-4.29877	-1.48286	2.83745
H	-3.65804	-0.067803	2.80279
Si	1.33226	2.33833	0.025858

## Sheet: HMCRB
HMCRB
open form A
C	-4.23461	-0.35523	0.055106
C	-3.17034	-1.2878	0.240423
C	-1.8536	-0.990315	-0.048904
C	-1.51928	0.312142	-0.541615
C	-2.58223	1.24656	-0.719896
C	-3.88648	0.94139	-0.438913
H	-3.40453	-2.26717	0.631998
H	-2.35135	2.23345	-1.10316
H	-4.64835	1.68836	-0.615772
C	0.872064	-0.277092	-0.700725
C	0.622952	-1.60522	-0.226244
C	2.21923	0.07336	-1.01393
C	1.67538	-2.49104	-0.107128
C	3.25602	-0.81179	-0.898258
H	2.43107	1.07654	-1.36381
C	3.01916	-2.14716	-0.442833
H	1.47605	-3.48262	0.272704
H	4.25183	-0.490691	-1.17165
N	4.02721	-3.04773	-0.332532
N	-5.52006	-0.687048	0.33543
C	-0.180939	0.655676	-0.848132
C	0.3333	3.00584	0.96897
H	0.308967	4.01044	1.40888
C	0.345379	3.13001	-0.540412
C	0.118816	2.02316	-1.38691
C	0.613032	4.37623	-1.12163
H	0.786576	5.22906	-0.47072
C	0.164628	2.19361	-2.77765
H	-0.013297	1.33872	-3.42297
C	0.653989	4.54129	-2.50676
H	0.860131	5.51898	-2.93143
C	0.429031	3.44444	-3.33751
H	0.456619	3.55674	-4.41699
O	3.99149	4.64596	3.17186
H	3.84628	4.02216	1.5518
H	4.77796	4.17387	3.48185
H	1.67818	2.75624	3.16911
H	3.23815	4.13186	3.55932
H	2.30342	2.4335	4.53848
O	1.86975	3.1511	4.05416
O	3.68981	3.58122	0.676768
H	3.29566	4.27597	0.128878
O	1.45499	2.26302	1.47534
H	2.27927	2.70668	1.14041
H	-0.560455	2.47427	1.30759
C	-0.76409	-2.42609	1.68803
H	-1.74407	-2.78788	2.0092
H	-0.032409	-3.21364	1.88498
H	-0.503543	-1.55434	2.29555
C	-1.15742	-3.32115	-0.655806
H	-2.1435	-3.69459	-0.36987
H	-1.17421	-3.0909	-1.72519
H	-0.436654	-4.12507	-0.489529
C	-0.782948	-2.06284	0.175907
C	-6.63054	0.268507	0.183948
H	-7.40286	-0.035917	0.894636
H	-6.30082	1.26089	0.498328
C	-5.91585	-2.05203	0.722834
H	-5.29996	-2.7748	0.18348
H	-6.93867	-2.19552	0.365421
C	3.78979	-4.4602	0.00995
H	2.8462	-4.78554	-0.433492
H	4.57521	-5.03909	-0.482703
C	5.43146	-2.69389	-0.601789
H	5.62264	-1.67824	-0.249462
H	6.04406	-3.35246	0.019392
C	-5.85412	-2.30063	2.22997
H	-4.83479	-2.19273	2.61244
H	-6.49901	-1.59991	2.76953
H	-6.19702	-3.31671	2.44946
C	-7.20629	0.305749	-1.23151
H	-8.04897	1.00346	-1.26899
H	-6.45722	0.633669	-1.95815
H	-7.56914	-0.681877	-1.53322
C	3.81006	-4.73277	1.51394
H	4.769	-4.43873	1.95205
H	3.01506	-4.18662	2.03037
H	3.66492	-5.80231	1.69631
C	5.82452	-2.84698	-2.07074
H	5.24594	-2.1748	-2.71122
H	6.8862	-2.61077	-2.19494
H	5.66256	-3.87335	-2.41495
TS A
C	-4.24316	-1.01636	0.609025
C	-3.00026	-1.69082	0.54773
C	-1.78878	-1.0386	0.300525
C	-1.78877	0.357183	0.113032
C	-3.01955	1.03934	0.190107
C	-4.21568	0.392316	0.423091
H	-2.98131	-2.75849	0.714649
H	-3.03474	2.11598	0.055713
H	-5.12769	0.974605	0.445332
C	0.67863	0.323803	-0.391516
C	0.726055	-1.06264	-0.152642
C	1.84748	0.964342	-0.844738
C	1.94121	-1.73668	-0.321565
C	3.03949	0.28823	-1.03283
H	1.82211	2.02713	-1.06018
C	3.12421	-1.09655	-0.745551
H	1.97067	-2.79508	-0.105005
H	3.89507	0.836792	-1.40442
N	4.33043	-1.7908	-0.836522
N	-5.42194	-1.69012	0.829971
C	-0.538558	1.13203	-0.093363
C	-0.037198	3.29704	1.22789
H	-0.663349	3.82145	1.9554
H	1.0149	3.52263	1.43294
C	-0.420604	3.57468	-0.19498
C	-0.682804	2.4028	-0.900851
C	-0.516621	4.81954	-0.817755
H	-0.316061	5.73031	-0.261375
C	-1.04048	2.45399	-2.24979
H	-1.2453	1.53949	-2.79789
C	-0.875164	4.87348	-2.16549
H	-0.956042	5.83494	-2.66308
C	-1.13437	3.69629	-2.87825
H	-1.41395	3.74861	-3.92588
O	3.85293	1.49667	2.02481
H	2.36948	1.10537	2.51741
H	3.69778	1.65232	1.08024
H	4.67241	-1.47703	2.57416
H	4.34612	0.636767	2.03437
H	4.88344	-1.25474	1.07604
O	5.15747	-0.915332	1.95156
O	1.43506	0.855067	2.81407
H	1.38151	-0.106231	2.69419
H	0.530008	1.38748	1.99485
C	-6.69803	-0.985127	0.986591
H	-7.33372	-1.60752	1.62348
H	-6.53544	-0.056885	1.54168
C	-5.48463	-3.15333	0.88975
H	-6.4783	-3.44766	0.538529
H	-4.77571	-3.57805	0.17296
C	4.33186	-3.26886	-0.877208
H	3.41046	-3.62876	-1.34624
H	5.1467	-3.57197	-1.53946
C	5.50453	-1.15401	-1.46226
H	5.63476	-0.154771	-1.03892
H	6.37757	-1.73029	-1.1436
C	-7.4169	-0.701885	-0.334125
H	-8.37172	-0.200236	-0.143519
H	-6.81744	-0.059166	-0.98596
H	-7.62466	-1.63272	-0.87226
C	-5.24378	-3.73002	2.28631
H	-5.97998	-3.34506	2.99976
H	-5.33174	-4.82149	2.2632
H	-4.24629	-3.47566	2.65772
C	4.5283	-3.92112	0.49166
H	3.71744	-3.66798	1.18181
H	4.55279	-5.01066	0.383858
H	5.47279	-3.60179	0.942897
C	5.45244	-1.08892	-2.99013
H	5.37885	-2.09093	-3.42489
H	4.59731	-0.502539	-3.33903
H	6.36499	-0.620679	-3.37352
O	-0.262819	1.87003	1.38167
C	-0.504938	-1.87897	0.265996
C	-0.267834	-2.46897	1.68284
H	-0.195281	-1.67463	2.43234
H	-1.09511	-3.1243	1.96976
H	0.652857	-3.0584	1.71307
C	-0.687043	-3.0429	-0.747463
H	-0.844382	-2.65588	-1.75891
H	0.191298	-3.69222	-0.76353
H	-1.54523	-3.66435	-0.483071
open form B
C	3.75595	-1.3735	-0.145423
C	2.52523	-2.05499	0.067687
C	1.30081	-1.46176	-0.140155
C	1.24468	-0.109018	-0.587567
C	2.47445	0.575901	-0.790898
C	3.68512	-0.015019	-0.580719
H	2.55465	-3.07564	0.41921
H	2.45061	1.60359	-1.13385
H	4.58603	0.551382	-0.77091
C	-1.2136	-0.13524	-0.604318
C	-1.24708	-1.48912	-0.157988
C	-2.45468	0.523597	-0.823822
C	-2.46146	-2.10812	0.033786
C	-3.65535	-0.092158	-0.627636
H	-2.44805	1.55127	-1.16751
C	-3.7033	-1.45143	-0.191968
H	-2.474	-3.12928	0.38501
H	-4.56544	0.455375	-0.829084
N	-4.87885	-2.08844	-0.010393
C	0.010213	0.529557	-0.817959
C	-0.000938	1.93251	-1.33742
C	-0.015872	3.03854	-0.471623
C	0.00413	2.12048	-2.72014
C	-0.025067	4.31584	-1.03177
C	-0.005335	3.40229	-3.26238
H	0.015593	1.25403	-3.37489
C	-0.01992	4.50264	-2.41219
H	-0.036134	5.17403	-0.369608
H	-0.001144	3.53541	-4.33945
H	-0.027321	5.50875	-2.82023
C	-0.021306	2.8409	1.03594
H	-0.899123	2.22408	1.2908
H	0.857835	2.22933	1.29776
O	-0.028022	4.03046	1.77283
H	-1.41367	4.74465	1.63945
N	4.94165	-1.98808	0.045638
O	-2.32538	5.19376	1.60679
H	-2.44663	5.46344	0.687381
O	-0.304042	3.45961	4.27887
H	-0.206573	3.68083	3.29222
H	-1.25181	3.49106	4.46146
O	2.25813	5.21128	1.63377
H	1.35091	4.75122	1.66416
H	2.37934	5.47966	0.713992
C	0.033646	-2.27416	0.108123
C	0.028384	-2.7477	1.58072
H	0.914819	-3.34784	1.7951
H	0.016189	-1.89486	2.26498
H	-0.849581	-3.36413	1.78325
C	0.053995	-3.50585	-0.828644
H	-0.822091	-4.13363	-0.654358
H	0.055199	-3.198	-1.87793
H	0.94456	-4.1104	-0.645821
C	-4.95996	-3.51436	0.319797
H	-4.1677	-4.0545	-0.201475
H	-5.90193	-3.87838	-0.09657
C	-6.16836	-1.40196	-0.135643
H	-6.07322	-0.379366	0.232547
H	-6.86011	-1.90685	0.542467
C	6.21944	-1.28006	-0.079879
H	6.91867	-1.77016	0.601397
H	6.10629	-0.25774	0.283697
C	5.04638	-3.41253	0.376048
H	4.26738	-3.96677	-0.150488
H	5.99755	-3.75944	-0.033922
C	-4.91456	-3.78987	1.81709
H	-3.97121	-3.45485	2.25701
H	-5.73414	-3.27952	2.33168
H	-5.01567	-4.86384	1.99915
C	4.99582	-3.68893	1.87296
H	5.80358	-3.16501	2.39259
H	4.04427	-3.36942	2.30666
H	5.11389	-4.76105	2.05569
C	-6.72369	-1.42053	-1.55365
H	-7.70025	-0.928045	-1.57574
H	-6.06036	-0.896477	-2.24735
H	-6.85116	-2.4474	-1.90901
C	6.77632	-1.29548	-1.4973
H	6.10173	-0.791029	-2.19467
H	7.74155	-0.781243	-1.52222
H	6.92696	-2.3215	-1.8459
TS B
C	-1.34485	3.67964	-0.686282
C	-0.025525	3.30406	-0.336559
C	0.401062	1.98545	-0.31601
C	-0.513771	0.957165	-0.635938
C	-1.83065	1.32715	-0.988058
C	-2.24614	2.63305	-1.0237
H	0.676257	4.07669	-0.058798
H	-2.54561	0.552704	-1.24138
H	-3.26241	2.85009	-1.3234
C	1.23682	-0.772393	-0.351919
C	2.20284	0.209919	-0.036605
C	1.65863	-2.11877	-0.423759
C	3.51214	-0.177201	0.198954
C	2.95773	-2.49739	-0.207627
H	0.930922	-2.88616	-0.661619
C	3.94059	-1.52414	0.122015
H	4.23262	0.581035	0.468244
H	3.22116	-3.54221	-0.300537
N	5.23589	-1.87287	0.34992
C	-0.142331	-0.427805	-0.546481
C	-1.05974	-1.44493	-1.1507
C	-2.0022	-2.10612	-0.368766
C	-0.980783	-1.71276	-2.52092
C	-2.8611	-3.035	-0.956741
C	-1.83883	-2.63789	-3.10356
H	-0.244691	-1.19529	-3.12902
C	-2.78292	-3.30136	-2.31851
H	-3.592	-3.55069	-0.339461
H	-1.77011	-2.84275	-4.1671
H	-3.45283	-4.02691	-2.76932
C	-2.031	-1.75618	1.09884
H	-2.99145	-1.26595	1.33371
O	-0.946575	-0.926035	1.39609
N	-1.73252	4.98418	-0.70365
O	0.702546	-2.11923	3.02685
H	0.068341	-1.65462	2.39545
H	0.294733	-2.05534	3.8998
O	-1.7462	1.23433	2.52595
H	-1.40867	0.392446	2.05654
H	-1.56094	1.96205	1.91612
C	2.04514	2.1225	1.5522
H	1.38269	1.56044	2.21644
H	3.07687	1.94623	1.86536
H	1.83001	3.1871	1.67116
C	2.79216	2.50869	-0.827832
H	2.67049	2.22191	-1.87632
H	2.58959	3.57739	-0.739499
H	3.83486	2.34848	-0.548177
C	1.84571	1.69001	0.079934
O	-4.42553	0.899182	2.82884
H	-4.65317	0.114277	2.31332
H	-3.45228	1.01947	2.70007
H	-2.00309	-2.68411	1.69253
C	5.67586	-3.26818	0.356352
H	6.53539	-3.32691	1.02875
H	4.9009	-3.89507	0.802407
C	6.28153	-0.879865	0.594472
H	6.10079	0.002067	-0.024189
H	7.21931	-1.31297	0.237777
C	-3.11761	5.38088	-0.96018
H	-3.28173	6.32036	-0.426505
H	-3.79595	4.65427	-0.50785
C	-0.794241	6.08175	-0.470399
H	0.171658	5.8393	-0.919256
H	-1.17466	6.94634	-1.0201
C	6.41976	-0.490997	2.06171
H	7.24747	0.213931	2.18626
H	5.50802	-0.017723	2.43693
H	6.62692	-1.37159	2.67745
C	6.06467	-3.78938	-1.02172
H	6.42042	-4.82148	-0.94553
H	5.21506	-3.77071	-1.71012
H	6.86801	-3.18399	-1.45256
C	-0.630063	6.4411	1.00178
H	-1.59166	6.72217	1.44179
H	-0.222954	5.60318	1.5746
H	0.052416	7.28998	1.10691
C	-3.43582	5.56774	-2.43866
H	-3.31333	4.63378	-2.99433
H	-4.46962	5.90534	-2.55986
H	-2.77816	6.3204	-2.88432

## Sheet: HMCR550
HMCR550
open form A
C	3.87934	-2.247	0.97375
C	3.77469	-0.832662	0.939505
C	2.67835	-0.192524	0.396252
C	1.611	-0.979947	-0.149406
C	1.73122	-2.40312	-0.111623
C	2.82153	-3.02749	0.430276
H	4.59677	-0.260657	1.35698
H	0.933233	-3.00579	-0.528285
H	2.89384	-4.11025	0.449072
C	0.339567	1.04507	-0.776218
C	1.36604	1.90067	-0.255558
C	-0.822226	1.65034	-1.34792
C	1.20216	3.26952	-0.332996
C	-0.97391	3.00793	-1.42054
H	-1.6085	1.01303	-1.73336
C	0.047178	3.85672	-0.909731
H	1.96365	3.93974	0.05173
H	-1.86357	3.44891	-1.85865
N	-0.081019	5.19404	-0.97069
N	4.96131	-2.83967	1.51042
C	0.469767	-0.362812	-0.717343
C	-1.79215	-1.46914	0.941405
H	-2.52173	-2.16321	1.3763
C	-1.65609	-1.75832	-0.538832
C	-0.604621	-1.2235	-1.31391
C	-2.61621	-2.55847	-1.17163
H	-3.42692	-2.97014	-0.57623
C	-0.541726	-1.50289	-2.68607
H	0.271509	-1.08994	-3.2751
C	-2.54767	-2.8369	-2.53737
H	-3.30273	-3.46289	-3.00286
C	-1.50568	-2.30629	-3.29684
H	-1.43806	-2.51405	-4.36027
O	-5.80916	0.126099	2.48157
H	-5.10686	0.19297	0.886544
H	-6.04891	1.05638	2.60211
H	-2.86096	-0.07263	2.83261
H	-4.95956	0.035357	2.98338
H	-3.21938	0.749731	4.08579
O	-3.35988	-0.120273	3.68461
O	-4.59793	0.266921	0.038035
H	-4.72806	-0.589774	-0.395013
H	5.04645	-3.84575	1.52284
H	0.639025	5.80114	-0.606488
H	-0.901762	5.61626	-1.38073
O	-2.17561	-0.108685	1.2044
H	-3.03371	0.052804	0.728758
H	5.72004	-2.28962	1.88661
H	-0.840713	-1.62229	1.4581
C	2.71586	1.84497	1.85207
H	3.62489	1.48098	2.33665
H	2.7336	2.93703	1.88018
H	1.85468	1.49945	2.4313
C	3.86374	1.85824	-0.413549
H	4.79404	1.50713	0.039095
H	3.83178	1.5096	-1.4499
H	3.88246	2.95065	-0.417632
C	2.63553	1.33639	0.384509
TS A
C	-3.92854	-2.1952	0.401919
C	-2.63448	-2.63377	0.074116
C	-1.56435	-1.74972	-0.091402
C	-1.79543	-0.367856	0.073731
C	-3.09439	0.069157	0.411553
C	-4.14487	-0.811096	0.572657
H	-2.47935	-3.70143	-0.045525
H	-3.274	1.12886	0.557575
H	-5.13495	-0.447439	0.831646
C	0.58	0.135991	-0.603739
C	0.862061	-1.24167	-0.699092
C	1.57645	1.06577	-0.963996
C	2.15096	-1.63498	-1.08054
C	2.8399	0.665275	-1.35878
H	1.35568	2.1264	-0.923405
C	3.15203	-0.705658	-1.38619
H	2.39951	-2.68961	-1.14342
H	3.59299	1.39895	-1.63136
N	4.46184	-1.12598	-1.64524
N	-4.9746	-3.08836	0.500888
C	-0.701583	0.624583	-0.027442
O	-0.343652	1.00231	1.61128
C	-0.261033	2.43984	1.79598
H	0.786911	2.73144	1.92584
C	-0.866313	3.00471	0.545607
C	-1.10074	2.02724	-0.419824
C	-1.17601	4.34175	0.296131
C	-1.64792	2.37348	-1.65758
H	-1.8306	1.61103	-2.40836
C	-1.72332	4.6898	-0.939604
H	-1.97102	5.7264	-1.14605
C	-1.95842	3.71005	-1.91155
H	-2.38735	3.98923	-2.86883
O	3.87911	1.18749	1.83723
H	2.50443	0.410676	2.28192
H	3.61136	1.59004	0.997357
H	5.14228	-1.61177	1.50192
H	4.49059	0.455837	1.55888
H	5.22701	-0.993749	0.096878
O	5.51314	-0.851352	1.0308
O	1.66884	-0.087975	2.54147
H	1.7572	-0.952912	2.11188
H	0.550578	0.511507	1.97409
H	-5.77476	-2.77684	1.03623
H	-4.72285	-4.05283	0.676106
H	4.53134	-2.07904	-1.98736
H	4.99081	-0.486442	-2.23004
C	-0.186208	-2.32644	-0.432055
C	0.283287	-3.21302	0.753816
H	-0.41403	-4.03964	0.914843
H	1.27001	-3.6399	0.555621
H	0.337095	-2.63311	1.6806
C	-0.308121	-3.20237	-1.70991
H	-0.637383	-2.60192	-2.56339
H	0.651129	-3.65968	-1.96349
H	-1.02745	-4.01117	-1.56358
H	-0.818375	2.70103	2.70016
H	-0.994871	5.09746	1.05461
open form B
C	-4.35241	-1.51817	0.725264
C	-4.01899	-0.146741	0.679368
C	-2.78471	0.287231	0.248286
C	-1.81629	-0.675986	-0.165656
C	-2.16464	-2.05592	-0.112075
C	-3.38899	-2.47609	0.31764
H	-4.77494	0.562392	0.99887
H	-1.43402	-2.79349	-0.42166
H	-3.63856	-3.53145	0.353235
C	-0.172584	1.08821	-0.667502
C	-1.0879	2.10969	-0.273043
C	1.12513	1.47307	-1.11031
C	-0.691902	3.42728	-0.342376
C	1.51051	2.78028	-1.16956
H	1.82761	0.703576	-1.40707
C	0.597491	3.79523	-0.784646
H	-1.36814	4.22431	-0.052946
H	2.50426	3.05665	-1.5065
N	0.955615	5.09016	-0.84331
C	-0.540838	-0.272317	-0.611482
C	0.435123	-1.3115	-1.06379
C	1.32717	-1.91728	-0.163308
C	0.440731	-1.66975	-2.41224
C	2.20797	-2.88021	-0.655001
C	1.32754	-2.63227	-2.88572
H	-0.255498	-1.18966	-3.09348
C	2.21328	-3.23819	-2.00122
H	2.89807	-3.35243	0.034775
H	1.32321	-2.90236	-3.93675
H	2.91053	-3.99057	-2.35695
C	1.32601	-1.53078	1.30774
H	1.46376	-0.438353	1.36696
H	0.315683	-1.72598	1.70419
O	2.29056	-2.18993	2.07703
H	3.73212	-1.71575	1.6822
N	-5.56644	-1.91247	1.14811
O	4.67005	-1.38341	1.47535
H	4.84325	-1.65315	0.564291
O	2.30733	-1.137	4.44179
H	2.30833	-1.53848	3.5093
H	3.01354	-0.478274	4.44393
H	1.88651	5.35445	-1.13266
H	-6.25289	-1.23695	1.45226
H	-5.80363	-2.89322	1.1913
H	0.320585	5.81592	-0.543053
O	1.58445	-4.63426	2.49839
H	1.87115	-3.67742	2.30579
H	1.53915	-5.06939	1.63738
C	-2.48967	1.78076	0.222421
C	-2.64614	2.33834	1.65802
H	-3.65343	2.14943	2.03374
H	-1.92948	1.87063	2.33853
H	-2.4788	3.41697	1.66843
C	-3.51522	2.46848	-0.710916
H	-3.35235	3.54785	-0.726464
H	-3.4281	2.09006	-1.73312
H	-4.53265	2.28518	-0.360459
TS B
C	2.63019	-2.71796	-1.04568
C	1.28126	-2.96116	-0.737725
C	0.365437	-1.93156	-0.587865
C	0.806102	-0.594599	-0.737807
C	2.16502	-0.359855	-1.05645
C	3.06189	-1.38413	-1.21245
H	0.971063	-3.9938	-0.62005
H	2.51085	0.660457	-1.17378
H	4.10065	-1.18343	-1.45561
C	-1.48464	0.263811	-0.334004
C	-1.98555	-1.05245	-0.191126
C	-2.39075	1.34789	-0.246474
C	-3.34199	-1.23422	0.02627
C	-3.73165	1.15888	-0.038438
H	-2.01273	2.3592	-0.338542
C	-4.23476	-0.15268	0.103929
H	-3.74956	-2.23199	0.14601
H	-4.41021	2.00363	0.026322
N	-5.56761	-0.364813	0.281047
C	-0.085803	0.505232	-0.518991
C	0.363201	1.87516	-0.917776
C	0.988297	2.72812	-0.011106
C	0.164014	2.28725	-2.23984
C	1.40441	3.99222	-0.431844
C	0.583714	3.54554	-2.65317
H	-0.321872	1.61786	-2.94348
C	1.20586	4.40232	-1.74455
H	1.8834	4.65835	0.280854
H	0.422193	3.8586	-3.67961
H	1.53046	5.38887	-2.06046
C	1.19305	2.22523	1.39874
H	2.2744	2.07756	1.56719
H	0.875455	3.00922	2.10547
O	0.480853	1.04064	1.59144
N	3.50029	-3.75035	-1.21893
O	-1.48689	1.40821	3.24258
H	-0.719055	1.26102	2.60067
H	-1.10163	1.36231	4.12675
O	1.99514	-0.808516	2.47795
H	1.37583	-0.084038	2.09628
H	2.07259	-1.47938	1.78551
C	-1.10181	-2.95886	1.14112
H	-0.711585	-2.28874	1.91213
H	-2.12254	-3.23916	1.41085
H	-0.491799	-3.86503	1.13103
C	-1.62353	-3.25784	-1.30988
H	-1.63142	-2.79624	-2.30125
H	-1.00916	-4.15867	-1.35506
H	-2.64163	-3.56668	-1.06614
H	-5.88295	-1.27879	0.574365
H	-6.15556	0.418466	0.528523
H	4.49056	-3.552	-1.24099
H	3.23008	-4.67517	-0.914883
C	-1.07916	-2.27568	-0.247683
O	4.38643	0.422694	2.89259
H	4.25466	1.3392	2.61623
H	3.51958	-0.02378	2.72729

## Sheet: HMCR101
HMCR101
open form A
C	-4.23675	-0.218613	0.142383
C	-3.24287	-1.24975	0.337611
C	-1.9035	-1.01053	0.010424
C	-1.52942	0.274415	-0.504122
C	-2.53112	1.27022	-0.671814
C	-3.84801	1.05983	-0.377085
H	-2.24217	2.23998	-1.05962
C	0.865075	-0.347894	-0.646831
C	0.621237	-1.67487	-0.16315
C	2.20299	0.054908	-0.912826
C	1.70101	-2.55009	-0.004718
C	3.27733	-0.773894	-0.760655
H	2.38491	1.06875	-1.24689
C	3.04416	-2.11748	-0.318152
N	4.10576	-2.9568	-0.176197
N	-5.54592	-0.43083	0.447943
C	-0.185678	0.580999	-0.818302
C	0.384928	2.98885	0.928479
H	0.367528	4.00899	1.33184
C	0.392861	3.05983	-0.584355
C	0.134741	1.93213	-1.39356
C	0.688547	4.28062	-1.20563
H	0.885944	5.14909	-0.582798
C	0.17653	2.06008	-2.78905
H	-0.025055	1.18996	-3.40664
C	0.726642	4.40172	-2.59522
H	0.955337	5.36013	-3.05119
C	0.469368	3.2853	-3.38984
H	0.493908	3.36267	-4.47252
O	4.36425	4.43062	2.88847
H	4.07045	3.76802	1.30623
H	5.06036	3.8372	3.206
H	1.80732	2.9049	3.07778
H	3.54259	4.08286	3.32014
H	2.35753	2.68791	4.50129
O	2.04557	3.38625	3.90768
O	3.80534	3.31217	0.465065
H	3.46952	4.02289	-0.100624
O	1.50344	2.25974	1.46205
H	2.33081	2.63247	1.05692
H	-0.510934	2.47519	1.28839
C	-0.882216	-2.71973	1.58389
H	-1.59792	-2.1812	2.20457
H	-1.15935	-3.77643	1.59442
H	0.083339	-2.62311	2.07987
C	-1.18277	-3.12622	-1.02374
H	-2.19736	-3.51578	-0.938579
H	-1.11008	-2.60217	-1.98138
H	-0.498313	-3.97381	-1.05982
C	-0.832256	-2.12388	0.129754
C	-6.56216	0.636106	0.440524
H	-7.18286	0.52291	-0.458481
H	-7.2139	0.460598	1.30307
C	-6.10974	-1.7472	0.770672
H	-7.06201	-1.83524	0.236101
H	-6.33905	-1.78205	1.84413
C	3.98608	-4.40712	0.026407
H	4.69273	-4.89218	-0.65645
H	4.30859	-4.64876	1.04775
C	5.50279	-2.51346	-0.312305
H	6.08654	-3.06672	0.430825
H	5.87604	-2.81383	-1.30101
C	-5.16317	-2.86562	0.389764
H	-5.12671	-2.97836	-0.699953
H	-5.53338	-3.80622	0.807196
C	-5.95865	2.02887	0.494581
H	-6.75331	2.76491	0.34358
H	-5.52107	2.21038	1.48304
C	2.57142	-4.88992	-0.216562
H	2.34802	-4.88829	-1.28965
H	2.47829	-5.91991	0.13931
C	5.66448	-1.01578	-0.119048
H	5.47003	-0.751663	0.926842
H	6.69831	-0.738772	-0.343886
C	1.59887	-3.9718	0.523557
H	1.85581	-3.9814	1.59209
H	0.592202	-4.3689	0.451621
C	4.68142	-0.289202	-1.03405
H	4.95216	-0.485675	-2.08062
H	4.7263	0.794193	-0.888916
C	-3.77155	-2.54541	0.933209
H	-3.84172	-2.43919	2.02476
H	-3.10729	-3.38392	0.752418
C	-4.88219	2.13921	-0.583071
H	-5.35203	2.02488	-1.56994
H	-4.39852	3.12017	-0.572551
TS A
C	-4.01648	-1.14004	-0.046029
C	-2.76539	-1.79338	-0.267114
C	-1.55326	-1.05387	-0.26901
C	-1.61074	0.339967	-0.091338
C	-2.85877	0.967226	0.065771
C	-4.05147	0.278661	0.079027
H	-2.89196	2.04414	0.196869
C	0.900212	0.547355	-0.324127
C	1.03659	-0.841246	-0.4973
C	2.02979	1.3744	-0.440087
C	2.33546	-1.3772	-0.726079
C	3.30116	0.884337	-0.66708
H	1.91226	2.44925	-0.354359
C	3.47293	-0.522466	-0.751932
N	4.78613	-1.0376	-0.795969
N	-5.20245	-1.85245	0.088378
C	-0.399453	1.18345	0.032774
O	-0.333747	1.53438	1.67241
C	-0.070707	2.94358	1.89645
H	-0.727994	3.28978	2.69914
H	0.972155	3.08049	2.20392
C	-0.369278	3.57348	0.568203
C	-0.545608	2.61783	-0.43053
C	-0.458176	4.93493	0.277812
H	-0.32419	5.67418	1.06197
C	-0.808751	3.00904	-1.74457
H	-0.945143	2.26365	-2.52208
C	-0.724366	5.32836	-1.03479
H	-0.799922	6.38424	-1.27559
C	-0.89772	4.37002	-2.04076
H	-1.1061	4.68578	-3.05828
C	2.5715	-2.86002	-0.994916
H	1.82007	-3.48012	-0.514483
H	2.46959	-3.04226	-2.07223
C	3.95891	-3.32912	-0.565366
H	4.05604	-3.30442	0.526595
H	4.12092	-4.3629	-0.885606
C	5.00942	-2.43281	-1.19052
H	6.01417	-2.70902	-0.856538
H	4.99104	-2.53222	-2.28757
C	4.45655	1.85133	-0.841375
H	4.4767	2.19403	-1.88505
H	4.28539	2.74274	-0.229327
C	5.88323	-0.145785	-1.20915
H	5.87234	-0.005465	-2.30173
H	6.81813	-0.653992	-0.95713
C	5.79622	1.20147	-0.507237
H	6.62737	1.8358	-0.829852
H	5.89314	1.05729	0.574815
C	-5.27407	-3.28797	-0.174463
H	-6.10975	-3.69062	0.40716
H	-5.50261	-3.4795	-1.23554
C	-2.81812	-3.29385	-0.527869
H	-2.95436	-3.46774	-1.60385
H	-1.88616	-3.78377	-0.261675
C	-3.97368	-3.96929	0.20655
H	-4.02429	-5.02901	-0.061983
H	-3.82512	-3.91309	1.29137
C	-5.35659	1.03685	0.21062
H	-5.66773	1.39515	-0.780728
H	-5.20237	1.93022	0.824652
C	-6.49289	-1.16206	0.024787
H	-6.78626	-0.983916	-1.0226
H	-7.24207	-1.83292	0.455084
C	-6.46279	0.15633	0.784937
H	-6.28397	-0.039333	1.84861
H	-7.43659	0.648395	0.699907
O	1.05589	0.111743	3.08942
H	0.988144	-0.801783	2.77128
H	0.321119	0.872585	2.27149
O	3.51896	0.942142	2.73967
H	2.02493	0.37411	2.97748
H	3.38708	1.34644	1.86788
H	4.60986	-1.94548	2.38876
H	5.05254	-1.15861	1.14561
H	4.10509	0.165033	2.5489
O	5.14106	-1.17948	2.12534
C	-0.196518	-1.78079	-0.458491
C	-0.010779	-2.74204	0.784251
H	-0.013211	-3.798	0.50443
H	0.933749	-2.5481	1.2978
H	-0.808234	-2.59207	1.51509
C	-0.254409	-2.51812	-1.85211
H	0.496134	-2.12111	-2.53711
H	-0.089628	-3.59352	-1.76147
H	-1.21839	-2.36913	-2.33805
open form B
C	-3.72467	-1.43976	-0.107715
C	-2.50277	-2.13354	0.202742
C	-1.27112	-1.5256	-0.028742
C	-1.2384	-0.197642	-0.551067
C	-2.46146	0.475578	-0.803836
C	-3.67846	-0.100133	-0.607341
H	-2.43103	1.4913	-1.18055
C	1.22886	-0.126674	-0.529674
C	1.32963	-1.4486	-0.000439
C	2.41517	0.613747	-0.768143
C	2.59022	-1.98172	0.25865
C	3.66006	0.110021	-0.549988
H	2.33268	1.62382	-1.15212
C	3.7755	-1.21975	-0.035133
N	5.00982	-1.73413	0.178706
N	-4.93049	-2.02907	0.073452
C	-0.020704	0.46575	-0.792101
C	-0.091171	2.86015	0.953419
H	-0.938909	2.21342	1.23353
C	-0.088283	2.98914	-0.561613
C	-0.055059	1.84522	-1.37659
C	-0.117472	4.24019	-1.17704
H	-0.142564	5.12613	-0.552967
C	-0.052463	1.97352	-2.76592
H	-0.02696	1.07947	-3.38215
C	-0.115026	4.36652	-2.56438
H	-0.138612	5.35326	-3.01669
C	-0.082632	3.22977	-3.36464
H	-0.080747	3.31492	-4.44661
O	2.11415	5.30393	1.59972
H	2.49486	5.16423	2.47618
H	-0.023752	3.80652	3.1818
H	1.22026	4.81935	1.60719
H	0.942135	3.92765	4.42373
O	0.055353	3.63338	4.17893
O	-2.47179	5.18885	1.40115
H	-2.56661	5.45792	0.478512
O	-0.158334	4.07989	1.63645
H	-1.55327	4.75478	1.46436
H	0.815992	2.30485	1.24491
C	0.047942	-2.81661	1.68822
H	-0.840448	-2.48665	2.22534
H	0.077301	-3.90688	1.73297
H	0.903527	-2.43812	2.2462
C	0.0969	-3.3668	-0.899441
H	-0.765665	-4.03122	-0.868935
H	0.096158	-2.86942	-1.87343
H	0.996445	-3.97854	-0.843571
C	0.050055	-2.27873	0.219123
C	-6.20324	-1.31355	-0.068618
H	-6.64884	-1.57505	-1.03699
H	-6.87218	-1.6963	0.707971
C	-5.11455	-3.45741	0.336045
H	-5.91624	-3.80912	-0.321679
H	-5.46316	-3.58588	1.36811
C	5.27266	-3.1463	0.462431
H	6.11071	-3.45457	-0.17113
H	5.60193	-3.2439	1.50414
C	6.24183	-0.952988	0.022152
H	6.93281	-1.28872	0.800839
H	6.69679	-1.20286	-0.945059
C	-3.84166	-4.23517	0.106507
H	-3.63746	-4.32524	-0.9662
H	-3.96283	-5.24465	0.507565
C	-6.04671	0.187124	0.04908
H	-7.00317	0.661778	-0.183997
H	-5.78249	0.457782	1.07737
C	4.05487	-4.00062	0.208761
H	3.88238	-4.10875	-0.867869
H	4.22583	-4.99876	0.619872
C	6.00494	0.538386	0.121727
H	5.72424	0.806312	1.14635
H	6.93503	1.06117	-0.11518
C	2.84913	-3.3448	0.867259
H	3.05914	-3.22607	1.93875
H	1.99049	-4.0017	0.797982
C	4.89443	0.920488	-0.844265
H	5.23236	0.7244	-1.87004
H	4.65459	1.98514	-0.784545
C	-2.69251	-3.51399	0.79729
H	-2.9324	-3.41682	1.86464
H	-1.79408	-4.11677	0.743121
C	-4.95489	0.63925	-0.908441
H	-5.27429	0.429294	-1.93743
H	-4.77818	1.71577	-0.840984
TS B
C	-4.02274	-1.06851	-0.157907
C	-2.76904	-1.73859	-0.29738
C	-1.572	-1.00868	-0.364488
C	-1.62379	0.40029	-0.30279
C	-2.87699	1.03806	-0.224925
C	-4.06272	0.356027	-0.177357
H	-2.91337	2.12117	-0.191875
C	0.843434	0.592578	-0.536133
C	0.999743	-0.807164	-0.622542
C	1.97434	1.41919	-0.676534
C	2.28543	-1.34082	-0.813093
C	3.23749	0.931632	-0.877123
H	1.84954	2.49459	-0.617809
C	3.42241	-0.480892	-0.906571
N	4.69729	-0.979973	-1.01156
N	-5.19502	-1.76192	0.00327
C	-0.430434	1.19696	-0.259089
O	-0.258048	1.52977	1.83682
C	-0.344078	2.91812	1.98032
H	-1.18945	3.20334	2.62753
H	0.563475	3.33101	2.45198
C	-0.525481	3.54595	0.619903
C	-0.564226	2.67564	-0.464288
C	-0.650651	4.92011	0.411533
H	-0.620016	5.59486	1.26296
C	-0.727502	3.18186	-1.75739
H	-0.757009	2.50027	-2.60244
C	-0.812743	5.42351	-0.873567
H	-0.909291	6.49343	-1.02993
C	-0.851308	4.55059	-1.96239
H	-0.977364	4.93675	-2.96883
C	2.54537	-2.8292	-0.957345
H	1.78394	-3.41732	-0.455824
H	2.49721	-3.10416	-2.01807
C	3.91615	-3.21877	-0.427574
H	3.97457	-3.04218	0.652374
H	4.10056	-4.28281	-0.598562
C	4.97151	-2.40562	-1.1393
H	5.96066	-2.59109	-0.712365
H	5.0183	-2.69208	-2.20047
C	4.3941	1.88336	-1.068
H	4.45834	2.16748	-2.12614
H	4.20433	2.8033	-0.507947
C	5.82744	-0.109105	-1.33063
H	5.90698	0.024306	-2.41976
H	6.73346	-0.622598	-1.00199
C	5.70679	1.2411	-0.651844
H	6.55665	1.8675	-0.936186
H	5.74129	1.1097	0.435399
C	-5.26085	-3.21897	0.03395
H	-6.06444	-3.49875	0.721116
H	-5.53494	-3.60666	-0.957978
C	-2.82765	-3.25131	-0.38933
H	-3.01798	-3.54469	-1.42959
H	-1.88449	-3.70925	-0.111508
C	-3.94462	-3.81368	0.476687
H	-3.99222	-4.90189	0.382586
H	-3.76217	-3.57944	1.53162
C	-5.37072	1.10976	-0.141007
H	-5.67951	1.3476	-1.16693
H	-5.22648	2.06479	0.371951
C	-6.48942	-1.09286	-0.109288
H	-6.78508	-1.01909	-1.16616
H	-7.22692	-1.72673	0.387222
C	-6.46277	0.285728	0.521592
H	-6.27225	0.191105	1.59649
H	-7.43932	0.761879	0.399132
O	2.00658	0.656451	2.66911
H	2.55353	0.495584	1.88748
H	1.11246	0.991525	2.30886
O	2.99934	2.731	4.1186
H	2.64355	1.98516	3.57538
H	2.42005	3.48009	3.92631
H	-2.81813	0.012177	2.42051
H	-1.45973	0.77382	2.58516
O	-2.19033	0.303656	3.09526
C	-0.221309	-1.74042	-0.493759
C	-0.02381	-2.57255	0.829216
H	0.049329	-3.64475	0.638513
H	0.883584	-2.26591	1.35205
H	-0.854614	-2.41433	1.51858
C	-0.288526	-2.60519	-1.80227
H	0.476951	-2.29907	-2.51521
H	-0.150512	-3.66896	-1.60176
H	-1.24633	-2.48477	-2.30735

## Sheet: 3MHMRG
3MHMRG
open form A
C	4.30866	-1.84719	1.18756
C	4.14504	-0.449085	1.10038
C	3.01584	0.059382	0.493941
C	1.9888	-0.76571	-0.054982
C	2.18531	-2.17657	0.047206
C	3.29696	-2.70286	0.643832
H	4.89487	0.224427	1.50024
H	1.42984	-2.83742	-0.361406
H	3.43191	-3.7774	0.713715
C	0.783977	1.24327	-0.702794
C	1.84117	2.02475	-0.146463
C	-0.305274	1.96619	-1.27864
C	1.84337	3.40375	-0.157708
C	-0.324041	3.33223	-1.30141
H	-1.1318	1.40899	-1.703
C	0.755924	4.08788	-0.740081
H	2.67303	3.94815	0.279262
H	-1.15838	3.86727	-1.74348
O	2.91848	1.42002	0.434578
N	0.720879	5.43206	-0.774311
N	5.39586	-2.38136	1.7727
C	0.862465	-0.162811	-0.652996
C	-1.43258	-1.12919	0.94563
H	-0.460871	-1.17239	1.44348
H	-2.08859	-1.83896	1.4575
C	-1.29551	-1.4969	-0.518479
C	-0.208106	-1.00681	-1.27218
C	-2.27008	-2.29719	-1.15582
C	-0.09091	-1.30562	-2.63581
H	0.753216	-0.92104	-3.19947
C	-2.1299	-2.58592	-2.51982
H	-2.87977	-3.2028	-3.00709
C	-1.054	-2.09661	-3.25746
H	-0.964121	-2.3303	-4.31391
O	-5.53918	0.493128	2.45066
H	-4.84816	0.597998	0.856353
H	-5.7789	1.41943	2.59897
H	-2.5916	0.26731	2.757
H	-4.6851	0.389353	2.94249
H	-2.92	1.0704	4.0317
O	-3.07754	0.210005	3.61636
O	-4.34155	0.682266	0.007446
H	-4.63043	-0.074578	-0.522064
H	5.51982	-3.38243	1.813
H	6.12618	-1.79181	2.1448
H	1.47053	5.9806	-0.378638
H	-0.064998	5.91583	-1.18382
O	-1.91123	0.216242	1.13217
H	-2.7713	0.31997	0.646332
C	-3.45576	-2.85841	-0.402545
H	-3.14824	-3.60585	0.33771
H	-4.00372	-2.07981	0.13676
H	-4.1505	-3.34273	-1.09304
TS A
C	-2.80218	-3.67565	0.281798
C	-1.41854	-3.63813	0.051308
C	-0.776165	-2.41342	-0.088931
C	-1.45946	-1.18828	-0.019926
C	-2.8494	-1.24881	0.215089
C	-3.51211	-2.45076	0.359441
H	-0.841094	-4.55342	-0.025952
H	-3.40928	-0.322092	0.28354
H	-4.58315	-2.46948	0.536734
C	0.652012	-0.072272	-0.647913
C	1.26004	-1.3382	-0.663517
C	1.43426	1.01782	-1.07885
C	2.58676	-1.52276	-1.04447
C	2.75109	0.857722	-1.47315
H	0.992115	2.008	-1.09946
C	3.35188	-0.420493	-1.43459
H	3.00916	-2.5221	-1.03365
H	3.33314	1.71211	-1.80498
O	0.581716	-2.47984	-0.31269
N	4.71199	-0.565612	-1.71396
H	5.0874	0.147546	-2.33081
H	4.98008	-1.49701	-2.01537
N	-3.45407	-4.87155	0.476283
H	-4.45319	-4.86562	0.317331
H	-2.99044	-5.69994	0.126182
C	-0.718713	0.084802	-0.103876
C	-0.823605	1.98691	1.65537
H	0.114532	2.53715	1.79025
C	-1.5255	2.34227	0.377776
C	-1.47648	1.30896	-0.5548
C	-2.16626	3.55685	0.093543
C	-2.06657	1.45263	-1.81198
H	-2.0257	0.645647	-2.53655
C	-2.75546	3.6888	-1.16988
H	-3.26219	4.61696	-1.41941
C	-2.70849	2.6541	-2.11074
H	-3.17789	2.78801	-3.08048
O	3.56417	1.38268	1.77016
H	2.3442	0.430034	2.2632
H	3.23129	1.70359	0.918009
H	5.55506	-0.989848	1.4027
H	4.34037	0.817895	1.51649
H	5.4574	-0.297186	0.035262
O	5.69747	-0.131669	0.976984
O	1.56016	-0.122301	2.57744
H	1.7406	-1.0229	2.26616
H	0.412071	0.276241	1.9519
O	-0.546308	0.570278	1.51658
C	-2.21193	4.66443	1.1137
H	-2.69879	4.33341	2.03871
H	-1.20331	4.99616	1.38748
H	-2.76001	5.52916	0.732026
H	-1.44637	2.12553	2.54431
open form B
C	0.702546	3.98637	-0.680766
C	1.81837	3.25858	-0.238116
C	1.7588	1.8836	-0.232294
C	0.613408	1.15677	-0.652174
C	-0.500274	1.92537	-1.10041
C	-0.463118	3.28576	-1.11902
H	2.71748	3.76471	0.095179
H	-1.39115	1.4058	-1.4324
H	-1.31748	3.85966	-1.46272
C	1.80076	-0.89875	-0.175915
C	2.91957	-0.12722	0.231212
C	1.94257	-2.31423	-0.100987
C	4.09706	-0.687604	0.673925
C	3.09795	-2.89145	0.33152
H	1.10771	-2.93816	-0.397907
C	4.2081	-2.08542	0.729706
H	4.92269	-0.050929	0.971499
H	3.1927	-3.97108	0.382092
N	5.34225	-2.67277	1.15274
C	0.635341	-0.245288	-0.612832
C	-0.544117	-1.03677	-1.07303
C	-1.58978	-1.3652	-0.199284
C	-0.56302	-1.44681	-2.40924
C	-2.6664	-2.13289	-0.687426
C	-1.63404	-2.18836	-2.88614
H	0.259863	-1.18241	-3.06605
C	-2.67391	-2.5279	-2.02514
H	-1.65611	-2.50764	-3.92318
H	-3.50747	-3.11798	-2.39532
C	-1.58006	-0.893801	1.24361
H	-0.555305	-0.608838	1.51987
O	-2.46312	0.180072	1.47757
H	-3.5069	-0.214374	2.54813
N	0.718354	5.33037	-0.704011
O	-4.17749	-0.455684	3.27826
H	-4.75348	-1.12622	2.88945
O	-1.22955	2.19408	2.51007
H	-1.7158	1.39161	2.11684
H	-1.28449	2.09304	3.46861
H	5.41976	-3.67883	1.18614
H	1.52616	5.84522	-0.384204
H	-0.09482	5.84783	-1.00498
H	6.13614	-2.11798	1.4385
O	-4.0149	1.12795	-0.383583
H	-3.38433	0.726105	0.297196
H	-3.70441	0.800526	-1.23772
C	-3.8048	-2.5428	0.211177
H	-3.44755	-3.1074	1.07822
H	-4.34797	-1.67488	0.594628
H	-4.51209	-3.17242	-0.33302
O	2.86766	1.22958	0.199043
H	-1.83785	-1.74828	1.88885
TS B
C	-1.16173	3.80952	-1.00312
C	0.169896	3.54788	-0.663465
C	0.593194	2.23645	-0.543091
C	-0.2627	1.13741	-0.74407
C	-1.60328	1.43102	-1.09318
C	-2.04638	2.71901	-1.22319
H	0.872458	4.35771	-0.499442
H	-2.29265	0.60934	-1.25168
H	-3.07772	2.92515	-1.49059
C	1.62631	-0.337179	-0.329046
C	2.43378	0.803327	-0.152505
C	2.27424	-1.59389	-0.241526
C	3.793	0.72895	0.091232
C	3.61733	-1.69506	-0.005678
H	1.68276	-2.49454	-0.360674
C	4.40737	-0.525764	0.169177
H	4.36847	1.63971	0.215806
H	4.09559	-2.66702	0.057754
N	5.74549	-0.636277	0.375553
C	0.223916	-0.187576	-0.533653
C	-0.594343	-1.35045	-0.99095
C	-1.47373	-1.99888	-0.127899
C	-0.481912	-1.75808	-2.32389
C	-2.26162	-3.06465	-0.591884
C	-1.25456	-2.81431	-2.78656
H	0.206287	-1.24676	-2.99002
C	-2.13921	-3.45901	-1.92302
H	-1.16935	-3.13656	-3.81944
H	-2.74325	-4.28504	-2.28802
C	-1.53085	-1.50372	1.29734
H	-2.53736	-1.09273	1.49379
O	-0.536062	-0.547797	1.50976
N	-1.60393	5.08536	-1.16231
O	1.26134	-1.42304	3.16176
H	0.55853	-1.08159	2.51907
H	0.871771	-1.34439	4.04177
O	-1.47897	1.63722	2.43062
H	-1.09148	0.777195	2.02916
H	-1.41854	2.30633	1.73485
H	6.27102	0.175718	0.666129
H	6.13549	-1.54051	0.599384
H	-2.59812	5.25419	-1.21979
H	-1.031	5.84888	-0.831971
O	-4.09524	1.07201	2.90257
H	-4.27808	0.251869	2.4255
H	-3.14638	1.27565	2.71088
O	1.90452	2.05788	-0.216434
C	-3.21393	-3.76526	0.338604
H	-2.68126	-4.24095	1.16928
H	-3.92998	-3.06394	0.780083
H	-3.77683	-4.53843	-0.188892
H	-1.41464	-2.36155	1.98047

## Sheet: M3MHMRG
M3MHMRG
open form A
C	4.3725	-1.01328	0.902065
C	3.94169	0.32127	0.754058
C	2.70653	0.572612	0.19303
C	1.82205	-0.46109	-0.237153
C	2.2953	-1.80007	-0.088214
C	3.51912	-2.07313	0.45718
H	4.57164	1.14668	1.06676
H	1.66524	-2.61343	-0.427778
H	3.86398	-3.09726	0.557458
C	0.26154	1.24627	-0.97884
C	1.17854	2.24159	-0.532201
C	-0.940356	1.71952	-1.5842
C	0.944335	3.59525	-0.663905
C	-1.19167	3.05571	-1.73258
H	-1.66494	0.994605	-1.93507
C	-0.250772	4.0308	-1.27238
H	1.67855	4.30816	-0.305435
H	-2.11003	3.39721	-2.19935
O	2.35684	1.88583	0.061696
N	-0.51482	5.34273	-1.42381
N	5.56947	-1.2996	1.44654
C	0.569723	-0.119601	-0.790396
C	-1.51055	-1.62547	0.954998
H	-2.57136	-1.79008	1.17566
C	-1.30814	-1.87401	-0.542188
C	-0.347983	-1.18315	-1.31478
C	-2.11437	-2.85176	-1.17705
C	-0.194972	-1.47158	-2.68139
H	0.548411	-0.929221	-3.2574
C	-1.93534	-3.11986	-2.53905
H	-2.56126	-3.87163	-3.0116
C	-0.982563	-2.43985	-3.29296
H	-0.857619	-2.65734	-4.34919
O	-3.68796	1.83051	3.4318
H	-3.51694	1.50571	1.72908
H	-3.24706	2.69024	3.49608
H	-1.46015	-0.104275	3.0936
H	-2.9954	1.1885	3.73086
H	-1.01841	0.525025	4.43024
O	-1.73653	0.009406	4.03507
O	-3.32095	1.27608	0.78393
H	-3.99691	0.621886	0.55509
H	5.87991	-2.25644	1.53095
H	6.18923	-0.563915	1.7532
H	0.136134	6.04364	-1.10128
H	-1.36769	5.64771	-1.86926
O	-1.18004	-0.286657	1.3437
H	-1.92066	0.305598	1.04494
C	-3.18386	-3.61777	-0.429479
H	-2.779	-4.18043	0.41788
H	-3.95809	-2.95244	-0.02962
H	-3.6733	-4.33057	-1.0976
C	-0.68755	-2.57193	1.83254
H	-0.884132	-3.61728	1.58124
H	0.381301	-2.38329	1.70506
H	-0.943966	-2.41334	2.88416
TS A
C	2.51533	3.928	0.293367
C	1.1269	3.81253	0.119705
C	0.561208	2.55983	-0.080004
C	1.32625	1.38009	-0.124064
C	2.72062	1.52008	0.053479
C	3.30815	2.75151	0.249779
H	0.488407	4.68961	0.132062
H	3.34226	0.631303	0.032625
H	4.38285	2.83361	0.380086
C	-0.728662	0.165754	-0.732939
C	-1.42134	1.38592	-0.646018
C	-1.45456	-0.949772	-1.19966
C	-2.77153	1.50159	-0.96503
C	-2.79305	-0.85676	-1.53426
H	-0.94909	-1.9041	-1.2967
C	-3.47563	0.374047	-1.39705
H	-3.25934	2.46663	-0.876369
H	-3.33089	-1.72726	-1.8974
O	-0.805038	2.54545	-0.24666
N	-4.84977	0.441099	-1.62322
H	-5.203	-0.26344	-2.26242
H	-5.19286	1.36661	-1.85873
N	3.09619	5.14603	0.542716
H	4.08814	5.22129	0.360506
H	2.56214	5.96819	0.293947
C	0.66666	0.078497	-0.262326
C	0.969958	-1.9229	1.45987
H	0.062198	-2.52759	1.57691
C	1.60576	-2.17261	0.107641
C	1.47338	-1.08893	-0.764669
C	2.23896	-3.35572	-0.315471
C	2.00109	-1.12916	-2.05684
H	1.88883	-0.278833	-2.72181
C	2.76248	-3.38084	-1.61564
H	3.25609	-4.28493	-1.96133
C	2.65837	-2.28425	-2.47423
H	3.07685	-2.33859	-3.47443
O	-3.49841	-1.69281	1.66968
H	-2.33174	-0.64935	2.21349
H	-3.15555	-1.88363	0.783093
H	-5.56077	0.637345	1.54432
H	-4.31097	-1.15358	1.48905
H	-5.52323	0.026495	0.137288
O	-5.71908	-0.196094	1.07674
O	-1.59785	-0.04636	2.53641
H	-1.85518	0.840147	2.24043
H	-0.36427	-0.341308	1.83507
O	0.576996	-0.520809	1.38894
C	2.35525	-4.57858	0.562125
H	3.15928	-4.47513	1.29945
H	1.43045	-4.77318	1.11451
H	2.57929	-5.46003	-0.044224
C	1.86888	-2.08442	2.68069
H	1.34196	-1.72367	3.56871
H	2.1212	-3.13372	2.84393
H	2.79232	-1.51129	2.55993
open form B
C	-1.3801	4.06165	0.338935
C	-2.35984	3.15499	-0.094183
C	-2.12779	1.80449	0.04158
C	-0.936077	1.277	0.601773
C	0.037741	2.22269	1.03313
C	-0.170066	3.5629	0.911379
H	-3.28824	3.50522	-0.53128
H	0.961716	1.8584	1.46595
H	0.580887	4.27173	1.24381
C	-1.81314	-0.952669	0.255885
C	-2.98614	-0.375365	-0.296934
C	-1.77328	-2.37591	0.318695
C	-4.04589	-1.12421	-0.757169
C	-2.8101	-3.13723	-0.127757
H	-0.893462	-2.85363	0.733095
C	-3.97663	-2.52363	-0.679495
H	-4.91869	-0.632049	-1.17135
H	-2.76711	-4.22003	-0.073005
N	-4.99216	-3.29163	-1.11261
C	-0.775093	-0.11604	0.69701
C	0.451911	-0.691816	1.32651
C	1.61817	-0.951911	0.586986
C	0.381771	-0.945693	2.69898
C	2.73875	-1.47377	1.26948
C	1.48597	-1.46024	3.35993
H	-0.535345	-0.732233	3.23931
C	2.64812	-1.71799	2.64182
H	1.4433	-1.65891	4.42599
H	3.51508	-2.12234	3.15666
C	1.61403	-0.685034	-0.921939
H	0.695816	-0.115771	-1.12936
O	2.71253	0.080656	-1.35016
H	3.84162	-0.579283	-2.22486
N	-1.5658	5.38919	0.225073
O	4.58705	-0.908666	-2.82991
H	5.08747	-1.54139	-2.29894
O	1.89222	1.73127	-3.16018
H	2.22384	1.06869	-2.46317
H	2.22025	1.40383	-4.00728
H	-4.92798	-4.29842	-1.07165
H	-2.40973	5.7618	-0.185903
H	-0.854392	6.0349	0.535571
H	-5.81678	-2.87626	-1.52199
O	3.73073	1.88745	0.186526
H	3.31099	1.14985	-0.373095
H	4.27045	1.4353	0.847408
C	4.05884	-1.76418	0.597076
H	3.94409	-2.29906	-0.345932
H	4.60057	-0.840448	0.376319
H	4.68476	-2.37063	1.25635
C	1.47453	-1.98881	-1.71805
H	2.31144	-2.67007	-1.54684
H	0.551253	-2.51071	-1.44785
H	1.43436	-1.75785	-2.78722
O	-3.10934	0.973187	-0.395005
TS B
C	0.492828	4.19946	-0.53844
C	1.61732	3.41362	-0.264713
C	1.50544	2.03592	-0.303262
C	0.299586	1.37303	-0.603364
C	-0.822041	2.19438	-0.880384
C	-0.73712	3.55933	-0.855187
H	2.57249	3.86967	-0.028023
H	-1.7703	1.72289	-1.11132
H	-1.60648	4.17144	-1.07252
C	1.48599	-0.74066	-0.438719
C	2.6606	-0.019339	-0.140243
C	1.61962	-2.14772	-0.552637
C	3.88641	-0.627115	0.055452
C	2.82138	-2.77309	-0.371513
H	0.741918	-2.73704	-0.790855
C	3.98611	-2.01928	-0.055495
H	4.75696	-0.021209	0.281546
H	2.90419	-3.85093	-0.466386
N	5.16654	-2.65311	0.146401
C	0.249253	-0.050989	-0.57334
C	-0.950883	-0.760871	-1.11013
C	-1.91084	-1.33612	-0.273378
C	-1.08996	-0.811967	-2.5
C	-3.05762	-1.92476	-0.839397
C	-2.20523	-1.41893	-3.05934
H	-0.330962	-0.36519	-3.13498
C	-3.18394	-1.95694	-2.22905
H	-2.32208	-1.45518	-4.13773
H	-4.07216	-2.40498	-2.66563
C	-1.66115	-1.2718	1.22735
H	-2.60233	-0.95464	1.70662
O	-0.661251	-0.326082	1.4814
N	0.569599	5.55509	-0.53956
O	1.3735	-0.805773	3.0404
H	0.5867	-0.675803	2.42161
H	2.12236	-1.02118	2.46892
O	-1.78852	1.78793	2.33337
H	-1.30689	0.955331	1.9627
H	-1.55557	2.5115	1.73575
H	6.01801	-2.11779	0.237394
H	5.25147	-3.63295	-0.081739
H	-0.283405	6.09452	-0.573715
H	1.38624	6.00696	-0.153361
O	-4.44685	1.26938	2.01378
H	-4.51042	0.348254	1.72793
H	-3.47863	1.44365	2.11673
O	2.64271	1.33719	-0.030749
C	-4.16142	-2.50285	0.009553
H	-3.88512	-3.4728	0.434046
H	-4.41829	-1.8467	0.847036
H	-5.06118	-2.65145	-0.591675
C	-1.29002	-2.64314	1.8038
H	-2.06413	-3.39143	1.61704
H	-0.353905	-3.00009	1.36549
H	-1.15418	-2.56078	2.88619
